# Supplementary material for: Comparative mapping in intraspecific populations uncovers a high degree of macrosynteny between A- and B-genome diploid species of peanut
Source: PubMed Central journal article supplement (PMC3532320; doi:10.1186/1471-2164-13-608), 2012-11-10
Supplement: 1471-2164-13-608-S5.pdf [file 1471-2164-13-608-S5.pdf]

A.

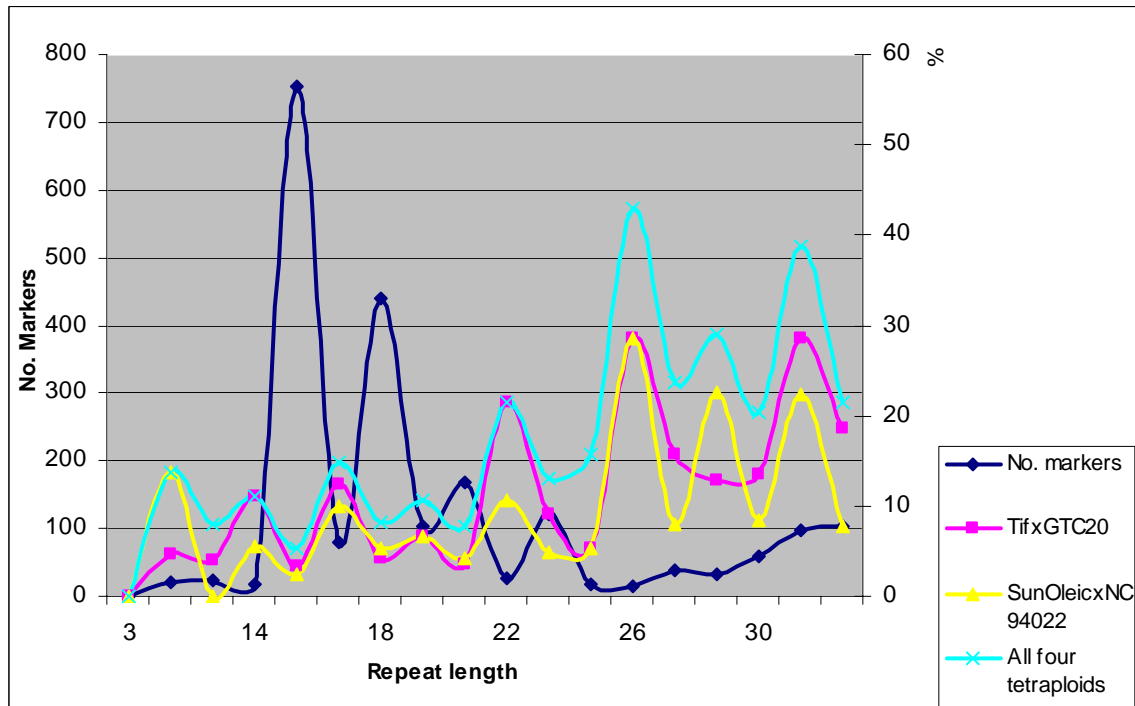

B.

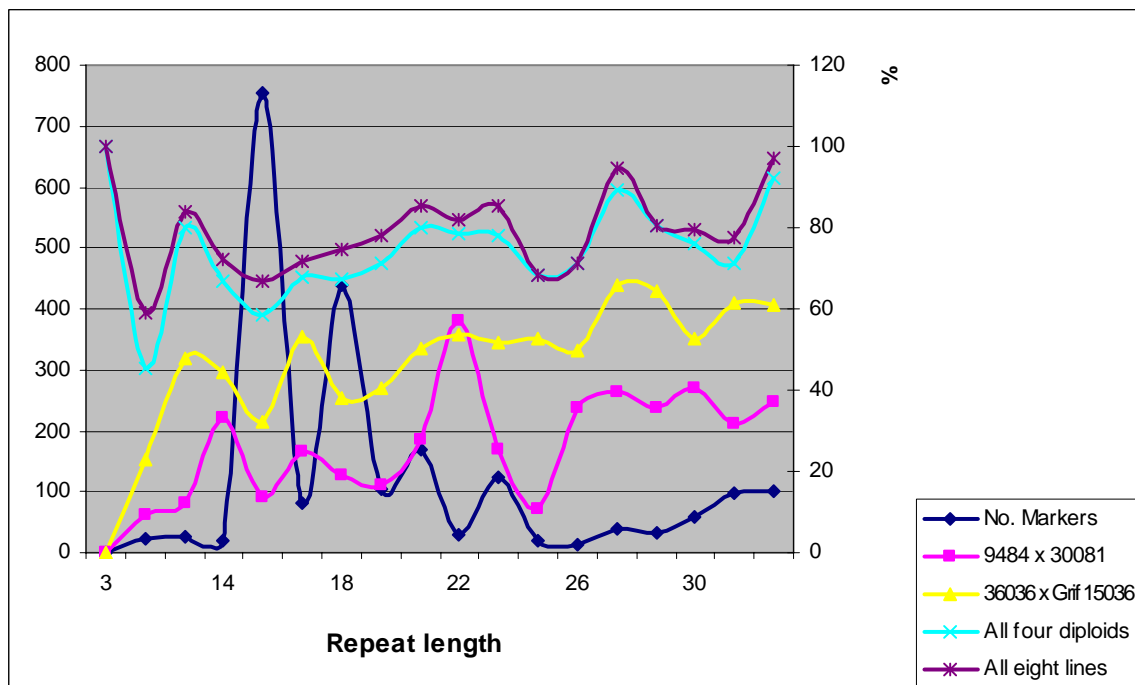

Additional file 5. Effect of SSR length on frequency of polymorphism among tetraploid and diploid genotypes.
