# Supplementary material for: Comparative mapping in intraspecific populations uncovers a high degree of macrosynteny between A- and B-genome diploid species of peanut
Source: PubMed Central journal article supplement (PMC3532320; doi:10.1186/1471-2164-13-608), 2012-11-10

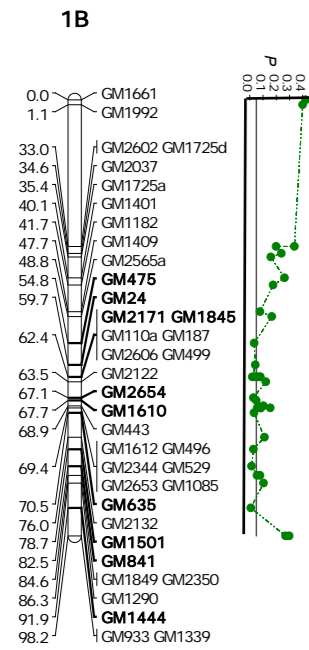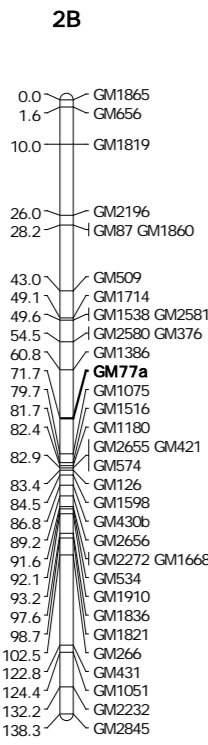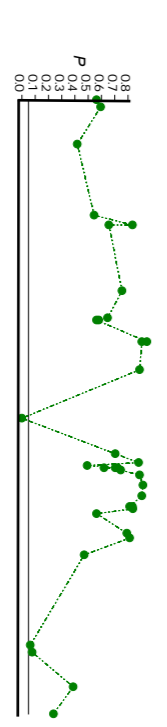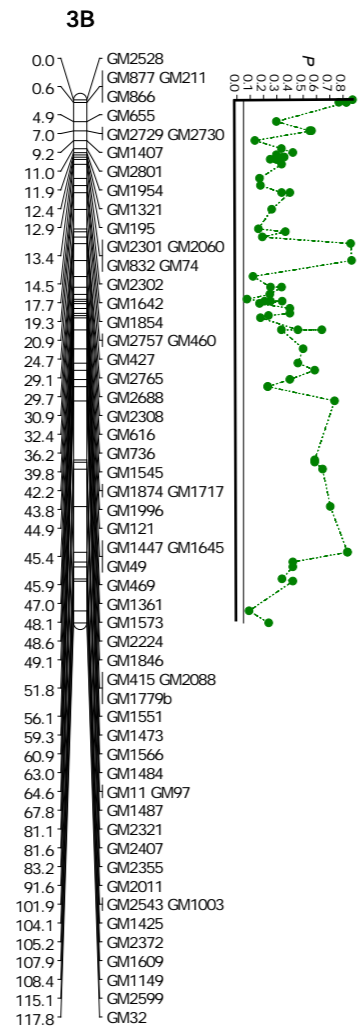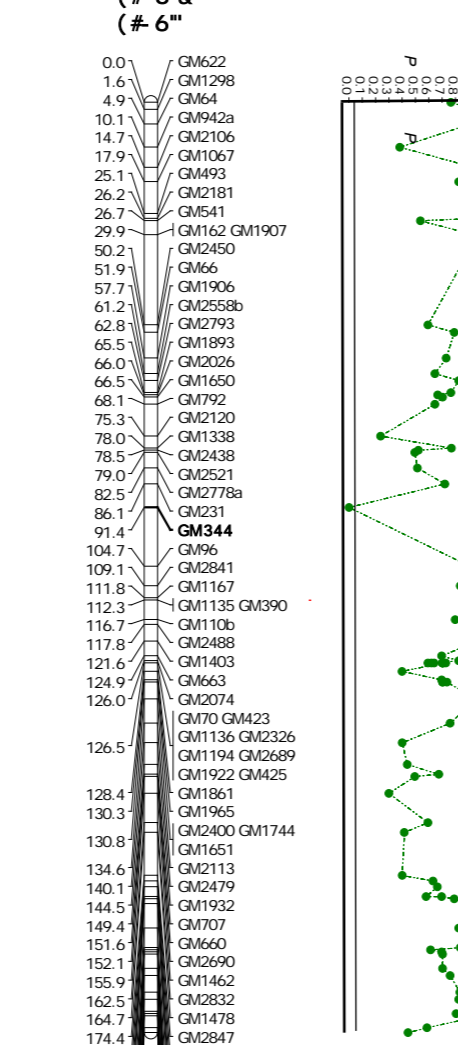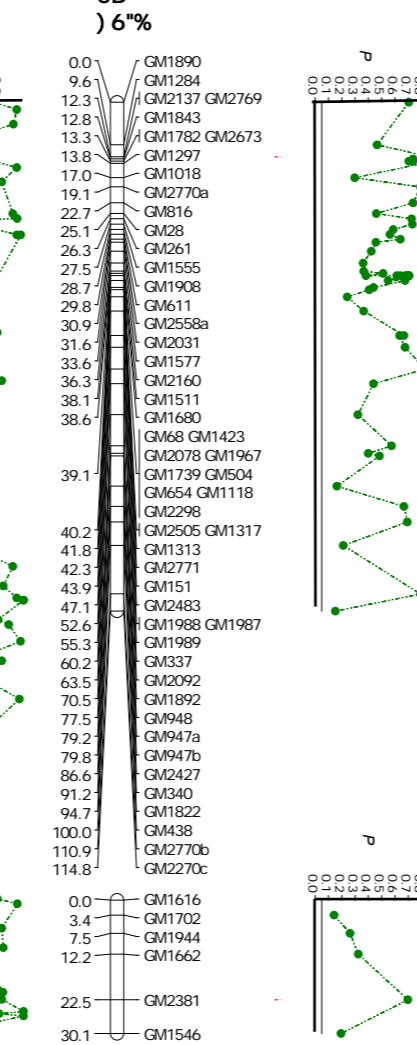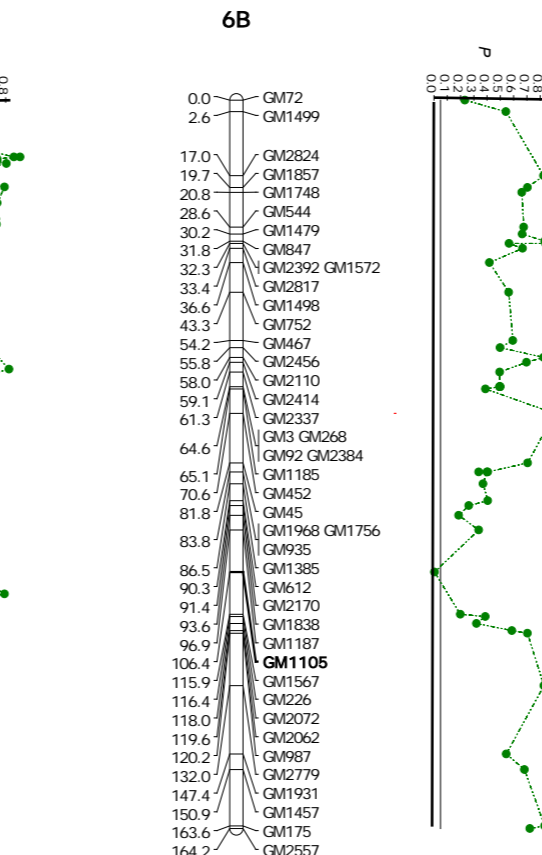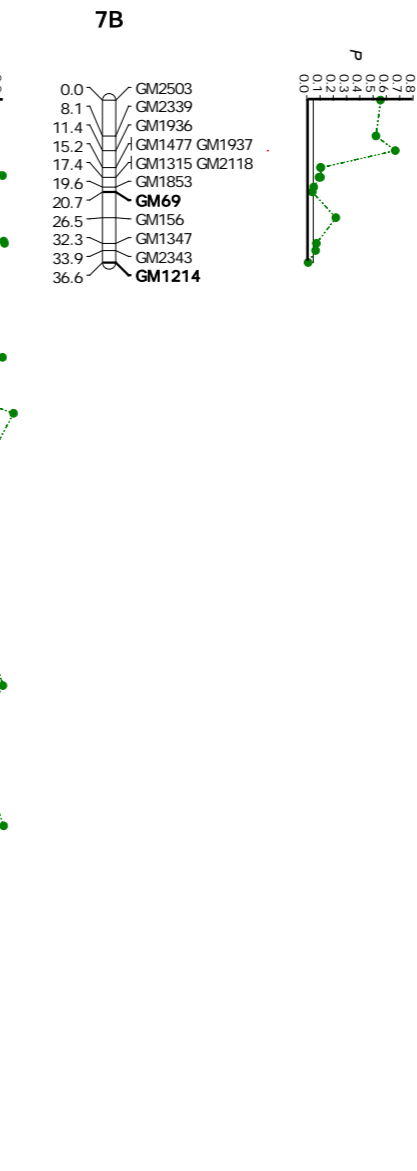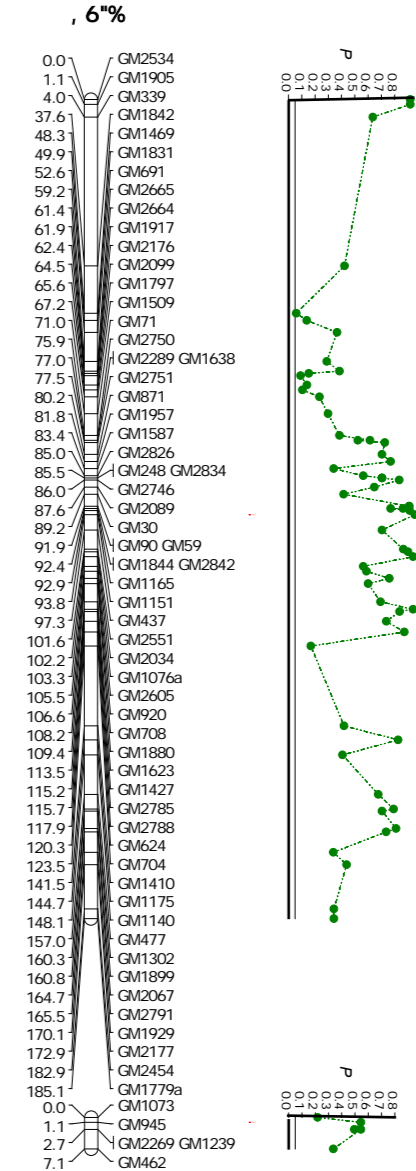

Supplement: 1471-2164-13-608-S8.pdf [file 1471-2164-13-608-S8.pdf]
